# Supplementary material for: Cervical Length at Mid-Pregnancy and the Risk of Primary Cesarean Delivery
Source: Atypon-hosted journal article supplement (doi:10.1056/nejmoa0706834), 2008-03-26
Supplement: nejm_smith_1346sa1.pdf [file nejm_smith_1346sa1.pdf]

## Supplementary Appendix

This appendix has been provided by the authors to give readers additional information about their work.

Supplement to: Smith GCS, Celik E, To M, Khouri O, Nicolaides KH. Cervical length at mid-pregnancy and the risk of primary cesarean delivery. *N Engl J Med* 2008;358:1346-53.

**Web Table. Unadjusted and adjusted odds ratios for cesarean delivery for dystocia in relation to maternal and outcome characteristics.**

| Variable                    | Unadjusted analysis |         | Analysis adjusted for characteristics of mother and infant |         |
|-----------------------------|---------------------|---------|------------------------------------------------------------|---------|
|                             | Odds ratio (95% CI) | P Value | Odds ratio* (95% CI)                                       | P Value |
| Quartile of cervical length |                     |         |                                                            |         |
| 1 (referent)                | 1.0                 |         | 1.0                                                        |         |
| 2                           | 1.21 (1.11-1.33)    | <0.001  | 1.17 (1.06-1.29)                                           | 0.001   |
| 3                           | 1.55 (1.41-1.71)    | <0.001  | 1.48 (1.34-1.64)                                           | <0.001  |
| 4                           | 2.07 (1.89-2.27)    | <0.001  | 1.82 (1.65-2.01)                                           | <0.001  |
| Age                         |                     |         |                                                            |         |
| <20                         | 0.42 (0.36-0.48)    | <0.001  | 0.49 (0.42-0.57)                                           | <0.001  |
| 20-24.9                     | 0.65 (0.59-0.72)    | <0.001  | 0.70 (0.63-0.77)                                           | <0.001  |
| 25-29.9 (referent)          | 1.0                 |         | 1.0                                                        |         |
| 30-34.9                     | 1.14 (1.05-1.24)    | 0.001   | 1.17 (1.07-1.27)                                           | <0.001  |
| 35-39.9                     | 1.47 (1.33-1.63)    | <0.001  | 1.48 (1.33-1.65)                                           | <0.001  |
| ≥ 40                        | 1.36 (1.06-1.74)    | 0.02    | 1.23 (0.95-1.61)                                           | <0.12   |
| Body mass index             |                     |         |                                                            |         |
| <20                         | 0.66 (0.58-0.76)    | <0.001  | 0.80 (0.70-0.92)                                           | 0.001   |
| 20-24.9 (referent)          | 1.0                 |         | 1.0                                                        |         |
| 25-29.9                     | 1.57 (1.46-1.69)    | <0.001  | 1.38 (1.28-1.49)                                           | <0.001  |
| 30-34.9                     | 2.03 (1.82-2.25)    | <0.001  | 1.66 (1.48-1.86)                                           | <0.001  |
| ≥ 35                        | 2.52 (2.19-2.90)    | <0.001  | 1.96 (1.69-2.28)                                           | <0.001  |
| Smoking status              |                     |         |                                                            |         |
| Non-smoker (referent)       | 1.0                 |         | 1.0                                                        |         |
| Smoker                      | 0.76 (0.68-0.84)    | <0.001  | 1.07 (0.95-1.20)                                           | 0.25    |
| Ethnicity                   |                     |         |                                                            |         |
| White (referent)            | 1.0                 |         | 1.0                                                        |         |
| Black                       | 1.15 (1.06-1.24)    | <0.001  | 1.59 (1.45-1.75)                                           | <0.001  |
| Other                       | 0.85 (0.75-0.95)    | 0.005   | 1.31 (1.15-1.49)                                           | <0.001  |
| Week of delivery            |                     |         |                                                            |         |
| 37                          | 1.09 (0.93-1.27)    | 0.28    | 0.91 (0.77-1.07)                                           | 0.25    |
| 38                          | 0.92 (0.82-1.03)    | 0.16    | 0.84 (0.74-0.95)                                           | 0.004   |
| 39                          | 0.77 (0.70-0.85)    | <0.001  | 0.75 (0.67-0.83)                                           | <0.001  |
| 40 (referent)               | 1.0                 |         | 1.0                                                        |         |
| 41                          | 1.45 (1.33-1.58)    | <0.001  | 1.21 (1.11-1.32)                                           | <0.001  |
| ≥ 42                        | 2.38 (2.12-2.68)    | <0.001  | 1.47 (1.29-1.69)                                           | <0.001  |
| Onset of labor              |                     |         |                                                            |         |
| Spontaneous (referent)      | 1.0                 |         | 1.0                                                        |         |
| Induced                     | 2.91 (2.71-3.12)    | <0.001  | 2.38 (2.20-2.59)                                           | <0.001  |
| Birth weight percentile     |                     |         |                                                            |         |
| 1-3                         | 1.00 (0.83-1.21)    | 0.98    | 0.98 (0.80-1.20)                                           | 0.83    |
| 4-10                        | 0.81 (0.71-0.93)    | 0.003   | 0.81 (0.70-0.94)                                           | 0.006   |
| 11-20                       | 0.78 (0.69-0.88)    | <0.001  | 0.80 (0.71-0.91)                                           | 0.001   |
| 21-80 (referent)            | 1.0                 |         | 1.0                                                        |         |
| 81-90                       | 1.48 (1.34-1.64)    | <0.001  | 1.41 (1.27-1.57)                                           | <0.001  |
| 91-97                       | 1.99 (1.78-2.23)    | <0.001  | 1.93 (1.72-2.17)                                           | <0.001  |
| 98-100                      | 3.34 (2.88-3.87)    | <0.001  | 2.96 (2.52-3.47)                                           | <0.001  |

\*Adjusted for maternal age, body mass index, smoking status, ethnicity, gestational age at birth, induced labor, birth weight percentile and hospital of delivery.  
CI denotes confidence interval.
